# Supplementary material for: Out of control mortality matters: the effect of perceived uncontrollable mortality risk on a health-related decision
Source: PeerJ. 2014 Jun 26;2:e459. doi: 10.7717/peerj.459 (PMC4081279; doi:10.7717/peerj.459)
Supplement: Supplemental Information 3 [file peerj-02-459-s003.xlsx]

## Sheet: Data dictionary
Variable	Notes
Timeoninfopage	Time (in seconds) spent on participant information page
Age	Age (years)
Sex	Sex (1=male, 2=female)
Timeontreatmentpage	Time (in seconds) spent on treatment page
Effort	Answer to, "How much effort will you put into looking after your health and safety over the coming week? 0 means no effort at all, 100 means the maximum effort you could make"
Veg	Answer to, "How likely is it that you will eat 5 portions of fruit or vegetables per day over the coming week? 0 means you definitely won't eat 5 portions of fruit and veg per day, 100 means you definitely will eat 5 portions of fruits or veg per day."
Exercise	Answer to, "How likely is it that you will do 30 minutes or more of physical exercise three times over the coming week? 0 means you definitely won't do three 30-minute blocks of exercise, 100 means you definitely will."
Units	Answer to, "How many units of alcohol are you likely to drink over the coming week."
Prize	Prize chosen (1= fruit, 2=chocolate).
PostcodeIMD	Index of Multiple Deprivation score for postcode
Treatment	0= Control, 1= Uncontrollable long life, 2= Uncontrollable short life, 3=Controllable long life, 4 =Controllable short life.
Controllability	0= Control, 1= Uncontrollable , 2= Controllable.
LongShort	0= Control, 1= Long life, 2 = Short life.
Missing variables	Coded as "-99"

## Sheet: Metrocentre_experiment_2_data
Timeoninfopage	Age	Sex	IMDScore	Manipulationtime	Effort	Veg	Exercise	Units	Prize	Treatment	Controllability	LongShort
46.665	43	1	-99	23	20	30	30	23	-99	2	1	2
2.772	43	2	-99	8	91	30	9	0	-99	3	2	1
27.939	32	2	-99	14	93	43	71	0	-99	3	2	1
11.156	26	1	-99	8	-99	-99	-99	-99	-99	4	2	2
27.359	54	2	-99	8	100	71	3	0	1	0	0	0
11.843	56	2	-99	13	69	90	80	10	1	1	1	1
1402.62	31	2	-99	51	70	19	81	5	1	2	1	2
134.626	36	2	-99	11	50	50	50	0	1	2	1	2
8.307	46	2	-99	16	67	62	84	12	1	2	1	2
11.493	38	1	-99	16	19	0	91	0	1	3	2	1
1.844	30	1	-99	7	54	43	46	0	0	0	0	0
4.564	33	2	-99	7	88	80	78	-99	0	0	0	0
2.464	41	1	-99	13	19	9	21	0	0	1	1	1
11.914	27	2	-99	14	80	75	100	0	0	1	1	1
30.798	33	2	-99	9	70	50	81	15	0	1	1	1
13.56	32	2	-99	7	50	18	29	0	0	2	1	2
78.929	38	2	-99	7	71	90	8	10	0	2	1	2
4.765	32	2	-99	7	60	20	39	0	0	2	1	2
9.879	34	2	-99	7	80	20	95	0	0	3	2	1
12.243	29	1	-99	7	70	30	54	5	0	4	2	2
4.551	25	2	87.8045	9	70	0	36	14	0	2	1	2
8.312	43	2	68.4433	20	80	71	100	0	1	3	2	1
12.276	44	2	66.8234	15	0	100	100	0	-99	3	2	1
13.482	32	2	66.2075	8	93	69	100	0	0	0	0	0
6.324	42	2	65.4027	44	68	70	78	-99	0	1	1	1
19.942	49	2	64.3971	8	60	41	39	10	1	1	1	1
19.137	40	1	63.7815	16	19	19	19	-99	1	4	2	2
5.728	28	1	63.1567	18	68	73	71	3	0	4	2	2
6.783	27	1	59.1234	12	70	100	100	0	1	2	1	2
-99	21	1	58.0264	-99	-99	-99	-99	-99	-99	3	2	1
38.315	23	1	56.6215	12	70	10	40	0	1	1	1	1
5.39	22	1	55.678	0	-99	-99	-99	2	-99	4	2	2
26.445	57	1	54.7665	26	80	15	96	43	0	0	0	0
31.284	29	2	53.0132	46	96	61	71	10	1	3	2	1
13.303	35	1	51.8771	8	90	81	100	-99	0	0	0	0
8.23	18	2	51.7503	14	17	5	4	0	-99	3	2	1
4.359	43	2	51.3086	10	81	61	60	0	0	2	1	2
4.882	44	1	49.9397	8	40	60	81	0	1	1	1	1
2.076	22	1	49.9306	9	50	30	100	0	-99	1	1	1
30.615	20	1	47.0015	6	20	0	0	0	1	0	0	0
30.01	33	1	46.7627	21	83	58	100	0	1	2	1	2
5.001	26	1	46.5886	7	77	30	46	2	0	0	0	0
3.071	33	2	45.9464	6	100	100	100	3	1	4	2	2
6.925	29	1	45.9126	7	91	66	100	0	1	0	0	0
21.153	40	1	44.6778	15	81	90	50	5	1	1	1	1
17.067	28	1	44.5238	16	74	77	80	-99	0	3	2	1
4.618	29	1	43.5674	16	71	89	93	0	1	4	2	2
4.622	22	1	43.0481	229	67	67	68	-99	1	2	1	2
20.63	20	1	42.8885	10	-99	40	0	0	1	2	1	2
14.155	20	2	41.9011	11	91	71	100	1	0	1	1	1
4.436	28	1	41.7152	11	95	92	100	5	0	1	1	1
-99	49	1	40.7755	-99	-99	-99	-99	0	-99	3	2	1
-99	20	1	37.0266	-99	60	70	90	70	1	3	2	1
15.422	43	1	37.0037	7	75	50	100	10	0	2	1	2
3.79	34	1	36.7076	9	84	66	93	20	0	1	1	1
1.491	26	1	36.6583	7	22	62	60	7	1	1	1	1
9.864	29	2	36.5505	20	50	40	30	0	1	3	2	1
169.539	43	1	36.2191	18	50	45	55	0	1	2	1	2
12.172	39	2	36.2054	448	60	37	67	0	0	2	1	2
9.113	46	1	36.0736	8	91	60	91	0	0	1	1	1
5.589	44	1	34.8233	9	60	60	80	2	1	0	0	0
4.888	38	2	34.8189	23	70	19	60	0	0	4	2	2
21.252	24	1	34.7781	7	20	0	11	0	1	0	0	0
4.707	37	2	33.4436	37	70	50	100	0	1	2	1	2
6.816	40	1	33.4436	7	65	91	50	0	1	4	2	2
11.404	34	2	33.2163	10	19	0	0	5	1	4	2	2
6.81	40	1	33.1641	8	29	42	76	3	1	0	0	0
3.777	27	1	33.1628	24	71	81	61	10	0	2	1	2
11.885	24	1	33.1131	7	100	-99	100	0	1	0	0	0
3.254	19	1	32.5275	12	31	31	76	0	0	1	1	1
10.059	21	2	32.5114	8	90	0	100	10	0	0	0	0
20.781	33	1	32.3586	17	100	80	80	0	1	2	1	2
26.989	20	1	31.9461	17	44	70	50	-99	0	0	0	0
4.532	24	1	31.6927	6	72	69	39	-99	1	2	1	2
5.732	34	2	31.3873	11	60	20	60	0	1	2	1	2
13.686	44	2	30.5202	8	-99	1	81	1	0	0	0	0
23.017	50	2	29.5775	14	60	70	83	20	0	2	1	2
13.231	55	2	29.4773	21	96	90	10	2	1	3	2	1
11.426	26	2	28.8446	22	40	29	80	0	0	0	0	0
10.948	20	1	28.6071	8	59	60	60	4	1	4	2	2
9.689	36	2	28.4382	14	81	95	61	0	1	1	1	1
6.335	26	1	28.2622	56	50	50	50	-99	-99	1	1	1
3.192	28	2	27.8042	7	82	39	29	0	1	0	0	0
15.866	22	1	27.6286	37	91	70	100	0	1	2	1	2
43.658	25	1	26.6185	14	29	91	15	0	1	4	2	2
1.898	30	1	26.5447	22	-99	-99	-99	2	0	3	2	1
21.319	28	2	26.2648	12	39	40	9	10	1	3	2	1
10.77	35	2	26.1775	7	70	91	0	0	0	0	0	0
-99	20	2	25.9751	87	31	20	29	10	-99	4	2	2
7.595	37	1	25.4276	14	67	36	67	0	0	2	1	2
23.931	46	2	25.3847	14	100	81	60	5	0	1	1	1
63.6	30	2	25.3053	13	60	39	40	0	1	4	2	2
5.248	39	2	25.2952	16	56	72	64	0	-99	2	1	2
2.887	34	1	24.6162	6	70	36	9	0	0	1	1	1
4.963	21	2	24.2056	39	29	18	20	4	0	4	2	2
41.898	52	1	24.046	34	8	0	0	12	0	2	1	2
-99	28	1	24.0103	12	100	70	100	0	0	1	1	1
12.268	22	1	23.9454	11	80	60	90	20	1	1	1	1
3.023	43	1	23.8197	8	71	81	92	4	1	4	2	2
11.418	45	1	23.8197	48	79	70	100	0	0	2	1	2
2.907	32	1	23.2503	11	93	96	95	5	1	3	2	1
20.014	53	2	22.9069	9	70	86	40	22	-99	0	0	0
2.85	28	1	22.6269	19	9	9	9	0	1	1	1	1
4.367	40	1	22.4072	9	72	84	65	-99	1	3	2	1
6.586	33	1	22.3954	7	64	38	60	3	1	0	0	0
8.406	24	1	22.3954	9	30	71	30	10	0	2	1	2
106.692	39	1	22.1653	11	90	100	100	0	1	4	2	2
39.883	40	1	21.9866	9	39	59	38	10	1	0	0	0
37.398	22	1	21.7286	21	37	63	29	20	1	0	0	0
27.034	22	2	21.4798	11	30	20	20	0	1	2	1	2
22.474	28	1	21.2377	7	20	63	76	2	1	4	2	2
9.868	33	1	21.114	10	19	10	0	5	1	2	1	2
9.218	31	1	20.9989	14	81	70	70	23	0	1	1	1
8.34	47	2	20.9947	8	59	54	80	2	1	2	1	2
9.196	33	1	20.925	8	100	100	100	1	1	0	0	0
14.733	25	2	20.8774	7	70	80	60	0	1	4	2	2
87.326	18	1	20.56	7	70	70	70	2	1	0	0	0
3.631	19	1	20.56	6	80	80	100	-99	1	2	1	2
7.903	18	1	20.56	7	71	60	100	-99	1	2	1	2
1.875	23	1	20.3453	6	39	1	59	10	0	1	1	1
20.653	52	2	20.126	11	81	100	100	0	1	1	1	1
15.59	50	2	19.9795	7	81	30	20	0	1	1	1	1
9.94	28	1	19.5784	8	71	71	81	15	0	2	1	2
6.092	61	1	19.5455	7	80	93	89	0	1	3	2	1
7.834	19	2	18.9598	10	70	30	60	15	0	4	2	2
17.265	21	1	18.7562	18	61	28	9	5	0	2	1	2
14.651	28	2	18.6982	23	82	62	19	0	1	4	2	2
3.509	48	2	18.6681	7	61	70	72	6	1	3	2	1
20.232	39	2	18.6623	13	50	19	81	0	0	2	1	2
14.111	22	2	18.5666	8	94	100	100	0	0	2	1	2
6.396	33	1	18.3228	20	39	20	80	0	1	4	2	2
-99	21	1	18.2022	-99	80	70	70	0	1	1	1	1
4.967	29	1	18.2022	8	100	98	100	-99	0	1	1	1
6.142	27	1	18.2022	9	98	100	99	-99	0	4	2	2
4.855	25	1	17.4328	34	80	31	-99	-99	0	2	1	2
8.235	19	1	17.3681	9	90	30	81	-99	0	1	1	1
3.23	35	2	17.296	7	90	91	50	10	1	1	1	1
6.892	28	1	17.0082	10	100	71	81	0	0	4	2	2
12.266	50	2	16.9	12	71	69	53	2	1	4	2	2
7.886	21	2	16.5129	8	95	70	100	5	1	4	2	2
10.879	23	2	15.4708	13	40	70	100	0	1	4	2	2
2.88	24	1	15.3584	14	61	68	100	0	1	2	1	2
32.75	33	2	15.2874	9	100	100	100	-99	1	4	2	2
4.986	22	1	14.8964	37	24	41	60	3	1	2	1	2
4.302	23	1	14.8317	7	70	70	100	-99	0	1	1	1
2.421	28	1	14.5022	24	70	31	64	6	0	2	1	2
35.838	39	1	14.2214	9	60	81	100	0	1	1	1	1
8.804	34	2	14.1452	6	60	61	30	3	1	1	1	1
3.245	28	2	14.1296	7	71	91	100	10	1	1	1	1
22.696	26	1	14.1249	6	-99	-99	-99	30	1	2	1	2
11.756	44	1	14.1079	11	29	19	91	0	1	2	1	2
17.526	73	1	14.0499	11	9	0	90	25	1	4	2	2
13.314	47	2	13.7079	8	61	21	13	5	1	0	0	0
6.206	19	1	13.5944	11	-99	0	91	20	0	3	2	1
8.371	43	1	13.3354	12	50	60	70	5	1	1	1	1
5.876	19	1	13.267	11	100	81	78	-99	0	2	1	2
31.195	23	1	12.7357	19	60	25	75	10	-99	1	1	1
2.845	50	2	12.6084	10	88	68	26	0	1	2	1	2
4.841	21	1	12.5511	8	70	71	100	5	1	1	1	1
15.033	31	2	12.1036	21	70	80	80	0	0	2	1	2
7.719	35	1	11.6739	6	60	50	20	6	1	1	1	1
13.522	29	1	11.1395	7	75	60	100	-99	0	0	0	0
9.349	59	1	11.057	19	60	39	70	-99	1	2	1	2
6.248	25	1	11.0512	16	58	82	43	-99	0	2	1	2
2.496	37	1	11.0482	20	90	82	90	5	1	2	1	2
2.059	25	1	11.033	6	-99	-99	-99	40	1	0	0	0
13.637	32	1	10.7979	6	98	80	78	7	1	0	0	0
5.432	25	1	10.724	6	87	34	66	-99	0	4	2	2
3.833	22	1	10.62	14	100	100	100	0	1	0	0	0
4.157	22	1	10.0689	9	66	46	100	0	0	2	1	2
26.394	31	2	9.97547	7	70	30	60	5	-99	0	0	0
6.93	42	1	9.56088	12	84	85	88	1	1	2	1	2
3.824	30	2	9.40784	7	59	19	18	0	1	4	2	2
11.642	34	2	9.23986	113	75	74	50	2	1	3	2	1
12.06	32	1	9.09551	31	71	40	81	-99	0	1	1	1
13.298	47	2	8.93475	231	70	80	100	9	1	3	2	1
4.076	44	2	8.8421	7	71	82	40	0	0	3	2	1
14.196	30	1	8.66827	22	60	81	100	30	1	1	1	1
3.733	37	1	8.18523	39	60	9	100	50	0	2	1	2
62.885	44	1	7.86215	9	90	70	100	10	0	1	1	1
12.146	19	1	7.33885	15	29	0	19	6	0	2	1	2
11.169	47	2	7.16598	9	88	68	91	0	1	3	2	1
6.718	45	2	6.83348	16	60	61	50	10	0	2	1	2
22.473	42	1	6.01545	7	80	95	81	8	1	2	1	2
5.986	33	1	5.83617	7	76	58	70	6	1	0	0	0
21.273	50	2	5.80226	8	81	100	59	10	1	1	1	1
3.407	34	1	5.7332	8	75	74	100	15	0	1	1	1
4.669	47	2	5.52022	6	76	90	100	10	0	0	0	0
3.302	20	1	5.48792	9	62	-99	66	-99	1	2	1	2
4.241	29	1	5.48792	18	-99	-99	-99	50	0	2	1	2
13.644	23	1	5.22224	14	81	70	100	-99	0	0	0	0
13.467	46	2	5.02102	9	65	46	0	2	1	3	2	1
5.601	28	2	4.59992	14	68	35	39	15	0	0	0	0
6.768	36	2	3.63931	10	62	43	44	30	0	2	1	2
13.077	45	1	3.14657	8	63	95	34	0	1	2	1	2
