# Supplementary material for: Out of control mortality matters: the effect of perceived uncontrollable mortality risk on a health-related decision
Source: PeerJ. 2014 Jun 26;2:e459. doi: 10.7717/peerj.459 (PMC4081279; doi:10.7717/peerj.459)
Supplement: Supplemental Information 4 [file peerj-02-459-s004.xlsx]

## Sheet: Data dictionary
Variable	Notes
Prize	Prize choice. 0=Chocolate, 1=Fruit.
Treatment	1 = Uncontrollable, 2 = Controllable
IMD	Index of multiple deprivation score for postcode
AGE	Age (years)
Missing data	Missing data is coded "-99"

## Sheet: Experiment_3_data
Prize	Treatment	IMDScore	AGE
1	2	-99	54
0	1	-99	17
0	1	-99	55
0	1	-99	-99
0	2	-99	54
0	1	-99	-99
0	2	-99	52
0	1	-99	56
1	2	74.48	19
0	1	71.83	30
0	2	67.33	20
0	1	64.97	26
1	1	64.23	21
0	1	64.23	19
1	2	61.82	23
0	1	60.86	41
1	2	58.05	25
0	2	57.71	35
0	2	57.16	36
0	2	55.21	23
1	2	54.99	54
0	2	49.95	46
1	1	47.94	24
0	1	47.92	32
0	2	47.25	44
0	1	47.14	19
1	1	46.28	38
1	1	46.28	36
1	2	46.28	28
0	1	46.28	51
0	2	45.97	32
1	2	45.22	21
0	2	45.22	20
1	2	45.17	34
0	1	45.17	51
0	1	45.05	24
0	1	44.54	20
0	1	44.54	20
0	2	43.72	54
0	2	42.21	33
0	2	42.18	64
0	1	41.98	17
0	2	41.98	22
1	2	41.56	20
0	2	41.56	33
0	1	41.49	64
0	2	41.47	17
0	2	41.47	22
1	1	41.44	52
0	1	41.44	64
0	1	41.25	16
0	1	41.25	63
0	2	41.25	24
0	1	41.22	23
1	1	40.51	18
0	1	40.51	71
1	1	40.39	72
1	2	40.39	29
0	1	40.19	21
0	2	39.34	18
0	1	39.01	17
0	1	38.97	26
0	1	38.62	27
1	1	38.6	22
0	2	38.6	32
0	2	38.6	36
0	1	38.6	27
0	2	38.1	18
1	2	38.08	29
1	2	36.93	37
0	2	36.93	69
0	1	36.84	18
1	2	36.76	23
0	2	36.69	20
0	2	36.66	23
0	2	36.33	33
0	1	36.25	-99
0	2	36.25	-99
0	1	36.21	23
0	2	36.21	20
0	1	35.98	20
1	2	35.84	28
0	1	35.84	18
0	2	35.19	17
0	1	35.12	24
0	2	35.02	74
0	2	35.02	23
1	1	34.77	49
0	2	34.65	24
0	1	34.59	53
0	1	34.59	17
0	2	34.15	22
1	1	34.05	39
0	1	33.96	24
0	1	33.92	40
1	2	33.71	22
0	1	33.71	-99
1	1	33.43	32
0	1	33.43	31
0	1	33.27	17
0	2	33.15	17
0	2	32.59	17
0	1	32.36	24
0	1	32.05	20
1	2	31.82	20
0	2	31.82	20
0	2	30.6	22
0	1	30.26	72
0	2	30	22
0	1	29.99	19
0	1	29.42	34
0	1	29.09	22
1	1	28.35	17
1	2	28.27	22
0	2	28.27	53
0	2	28.27	60
0	2	27.61	23
0	1	27.33	43
0	2	26.81	17
1	1	26.79	39
0	1	26.53	35
1	2	26.39	41
0	1	26.39	19
0	1	26.39	22
0	1	26.39	21
0	1	26.39	28
1	1	25.93	25
1	2	25.93	19
0	1	25.93	26
0	1	25.93	87
0	2	25.86	18
0	2	25.69	18
0	2	25.63	24
0	1	24.94	18
1	2	24.85	74
1	1	24.83	16
0	2	24.65	27
0	1	24.46	32
0	2	24.04	18
0	1	24.04	18
0	2	24.04	19
0	1	22.99	52
0	1	22.74	37
0	1	22.44	15
0	2	22.2	45
0	2	22.12	18
0	2	22.07	21
1	2	21.8	76
0	2	21.8	23
0	1	21.72	56
0	2	21.72	47
0	2	21.71	28
1	1	21.64	18
1	1	21.54	19
1	2	21.54	29
1	2	21.54	50
1	2	21.36	27
0	2	21.36	24
1	1	21.31	55
1	2	21.31	45
0	1	20.47	52
0	2	19.96	22
0	1	19.74	17
0	2	19.74	26
1	2	19.38	28
1	2	19.36	21
0	1	18.86	69
0	1	18.78	87
1	2	18.64	20
0	1	17.15	21
0	1	17.15	15
0	1	17.15	16
0	2	17.13	16
0	2	17.13	29
0	1	16.77	15
0	1	16.77	35
1	2	16.61	38
1	2	16.61	43
0	2	16.61	19
0	1	16.09	71
1	2	16.03	52
1	1	15.74	43
1	1	15.72	22
0	1	15.62	23
0	1	15.17	18
0	1	14.45	19
0	2	14.19	20
0	1	14.19	22
0	1	14.09	19
1	1	13.92	-99
0	2	13.9	25
0	1	13.51	16
0	1	13.27	57
0	1	13.1	18
1	2	13.03	40
0	2	13	20
1	1	11.92	37
1	2	11.12	75
1	1	10.95	49
0	1	10.95	24
1	2	10.55	21
1	1	10.48	71
0	1	9.88	18
1	1	9.78	46
0	2	9.52	53
0	1	9.52	55
0	1	9.52	24
0	2	8.71	55
0	2	8.44	24
0	1	8.2	36
0	1	8.2	33
0	1	7.91	53
1	1	7.79	17
0	1	7.71	21
0	1	7.56	20
1	2	7.52	19
0	2	7.48	24
0	2	7.48	57
1	2	6.87	31
0	2	6.79	61
1	1	6.71	75
0	2	6.71	32
0	2	6.53	25
0	2	6.23	17
0	1	6.21	17
1	2	6.08	20
0	2	5.55	52
0	1	5.55	23
1	2	5.52	21
0	2	5.52	31
0	1	5.5	61
0	1	5.49	18
1	2	5.43	41
0	1	5.43	64
0	2	4.74	42
0	2	4.56	22
0	2	3.75	24
